# Supplementary material for: Slow relaxation of the magnetization in two cobalt(iii)/cobalt(ii) dimers
Source: Royal Society of Chemistry journal article supplement (doi:10.1039/d3nj02890a), 2023-01-01
Supplement: d3nj02890a1.pdf [file d3nj02890a1.pdf]

Electronic Supplementary Information

**Slow relaxation of the magnetization in two cobalt(III)/cobalt(II) dimers**

Rabi Sankar Sarkar<sup>a</sup>, Carlos J. Gómez-García<sup>b</sup>, Michael G. B. Drew<sup>c</sup> and Shouvik  
Chattopadhyay\*

<sup>a</sup>*Department of Chemistry, Inorganic Section, Jadavpur University, Kolkata - 700032, India. e-mail: shouvik.chem@gmail.com*

<sup>b</sup>*Departamento de Química Inorgánica. Universidad de Valencia. C/ Dr. Moliner 50, 46100 Burjassot (Valencia) Spain.*

<sup>c</sup>*School of Chemistry, The University of Reading, P.O. Box 224, Whiteknights, Reading RG6 6AD, UK*

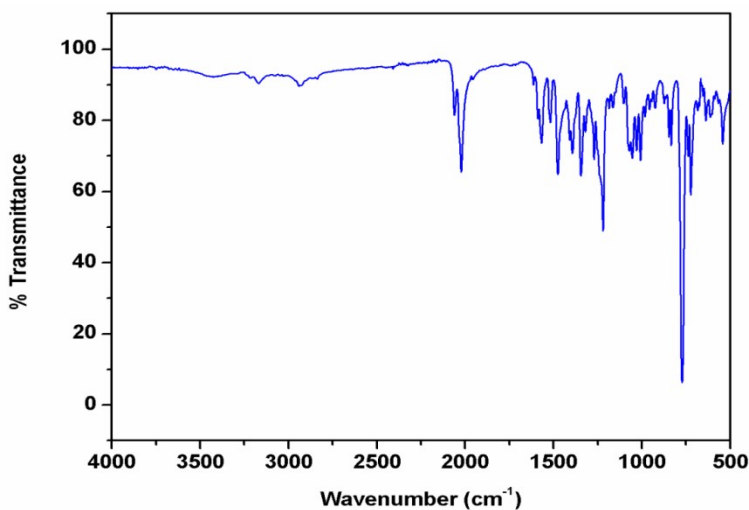

**FigureS1.** IR spectrum of compound 1.

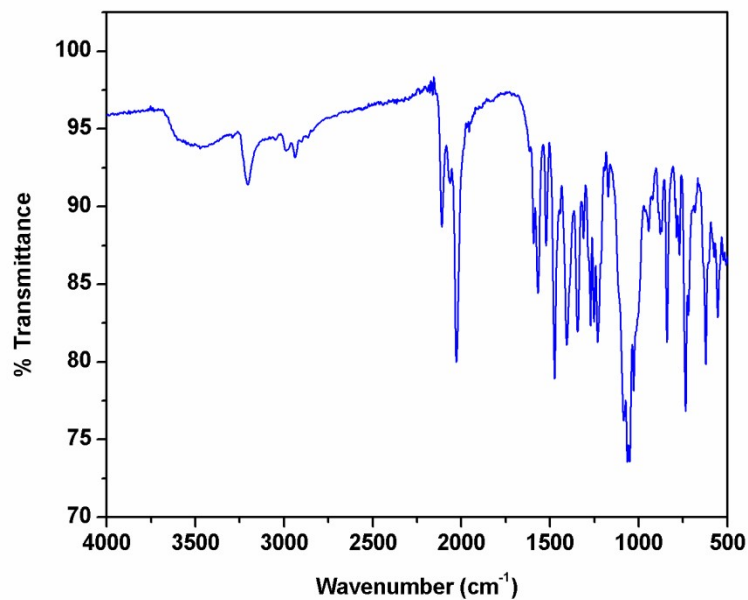

Figure S2. IR spectrum of compound 2.

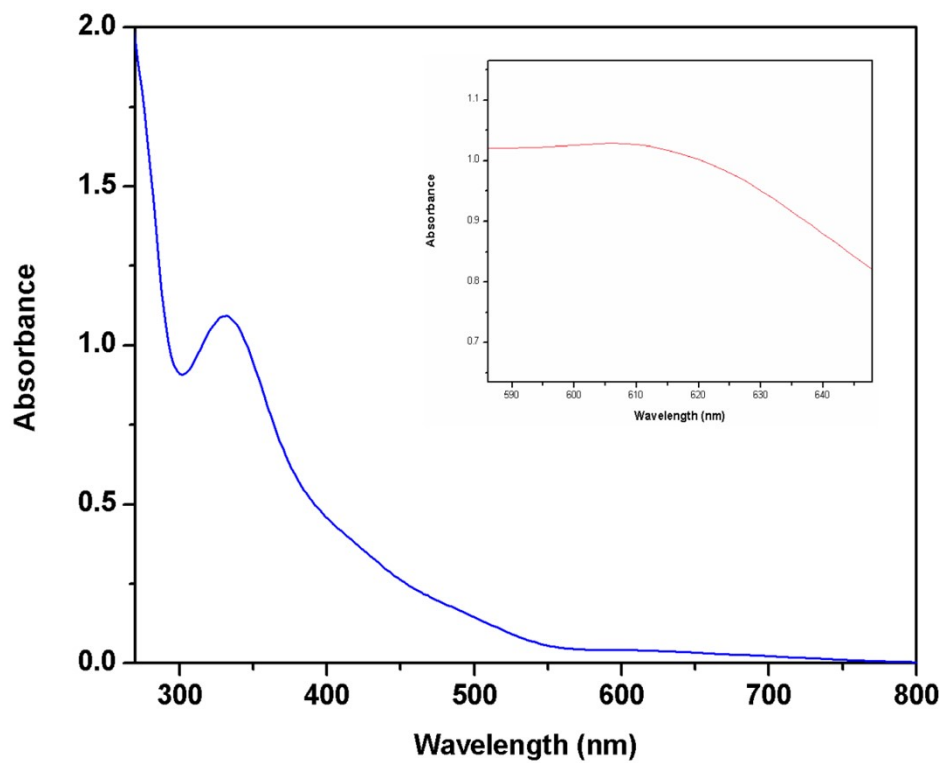

Figure S3. Electronic spectrum of compound 1 in acetonitrile. Inset shows the d-d absorption band in the visible region.

## BVS calculation

The bond valance sum(BVS) calculations allow the calculation of the oxidation state of the cobalt centres of both independent dimers in both compounds. Despite the long distortions from the octahedral geometry of the Co2 and Co4 centres in both compounds, the results clearly indicate that in both compounds the Co1 and Co3 centres are in the +3 oxidation state whereas the Co2 and Co4 centres are in the +2 oxidation state (Table S1).

**Table S1.** Bond valance sum(BVS) calculations for all the cobalt ions in compounds **1** and **2**.

| Compound | Dimer     | Cobalt centre | BVS of Cobalt |
|----------|-----------|---------------|---------------|
| <b>1</b> | <b>1A</b> | Co1           | 2.84          |
|          |           | Co2           | 1.78          |
|          | <b>1B</b> | Co3           | 2.96          |
|          |           | Co4           | 1.99          |
| <b>2</b> | <b>2A</b> | Co1           | 2.70          |
|          |           | Co2           | 1.96          |
|          | <b>2B</b> | Co3           | 2.99          |
|          |           | Co4           | 2.22          |

**Table S2.** Magnetic parameters of all the reported cobalt(II)/cobalt(III) dimers showing FI-SMM behaviour.

| CCDC     | Co(II)                                                                  | H (mT) | $U_{\text{eff}}$ (K) | $\tau_0$ (s)            | A ( $\text{s}^{-1}$ ) | C ( $\text{K}^{-n} \text{s}^{-1}$ ) | n      | Ref       |
|----------|-------------------------------------------------------------------------|--------|----------------------|-------------------------|-----------------------|-------------------------------------|--------|-----------|
| NINJAX   | Co <sup>II</sup> O <sub>5</sub> Cl                                      | 100    | 11.37                | $6.1 \times 10^{-6}$    | -                     | -                                   | -      | 66        |
| NINJIF   | Co <sup>II</sup> O <sub>5</sub> Br                                      | 100    | 20.86                | $1 \times 10^{-6}$      | -                     | -                                   | -      | 66        |
| RASQAG   | Co <sup>II</sup> O <sub>6</sub>                                         | 100    | 16.1(7)              | $7.1(9) \times 10^{-6}$ | $1.0(2) \times 10^6$  | $0.76(3) \times 10^{-3}$            | 9      | 67        |
|          |                                                                         | 200    | 18.0(10)             | $3.2(7) \times 10^{-6}$ | $2.3(2) \times 10^5$  | $0.87(8) \times 10^{-3}$            | 9      |           |
|          |                                                                         | 400    | 24.4(4)              | $5.9(5) \times 10^{-7}$ | $1.43(9) \times 10^4$ | $1.2(6) \times 10^{-3}$             | 9      |           |
| GASMOF   | Co <sup>II</sup> O <sub>6</sub>                                         | 50     | 16.4                 | $4.29 \times 10^{-7}$   | $2.019 \times 10^3$   | -                                   | -      | 68        |
|          |                                                                         | 100    | 19.0                 | $2.81 \times 10^{-7}$   | $1.682 \times 10^3$   | -                                   | -      |           |
|          |                                                                         | 250    | 15.3                 | $7.71 \times 10^{-7}$   | $1.341 \times 10^3$   | -                                   | -      |           |
| GASMUL   | Co <sup>II</sup> O <sub>6</sub>                                         | 50     | 22.3                 | $4.61 \times 10^{-7}$   | $4.81 \times 10^2$    | -                                   | -      | 68        |
|          |                                                                         | 100    | 32.3                 | $0.82 \times 10^{-7}$   | $2.275 \times 10^2$   | -                                   | -      |           |
|          |                                                                         | 250    | 35.2                 | $0.50 \times 10^{-7}$   | $1.006 \times 10^2$   | -                                   | -      |           |
| XEHNIL   | Co <sup>II</sup> O <sub>5</sub> N                                       | 140    | -                    | -                       | $170(3) \times 10^2$  | 2.7(1)                              | 6.2(3) | 69        |
| XEHNOR   | Co <sup>II</sup> O <sub>5</sub> N                                       | 100    | -                    | -                       | $3.5(2) \times 10^2$  | 0.57(3)                             | 6.4(3) |           |
| XEHNUX   | Co <sup>II</sup> O <sub>5</sub> N                                       | 140    | -                    | -                       | $5(1) \times 10^2$    | 15(4)                               | 5.2(2) |           |
| XEHPAF   | Co <sup>II</sup> O <sub>5</sub> N                                       | 100    | -                    | -                       | $32(5) \times 10^2$   | 17(6)                               | 6.7(3) |           |
| <b>1</b> | Co <sup>II</sup> O <sub>5</sub> N<br>Co <sup>II</sup> O <sub>5</sub> Cl | 90     | 7.3(2)               | $6.9(3) \times 10^{-6}$ | $2.0(2) \times 10^3$  | $5.88(5) \times 10^{-2}$            | 9      | This work |
| <b>2</b> | Co <sup>II</sup> O <sub>5</sub> N<br>Co <sup>II</sup> O <sub>6</sub>    | 50     | 5.3(2)               | $5.9(1) \times 10^{-6}$ | $1.2(7) \times 10^3$  | $3.26(9) \times 10^{-2}$            | 9      | This work |
